# Supplementary material
Source: MDPI journal article supplement (https://www.mdpi.com/2073-4344/11/6/735)
Supplement: s1 [file s1]

## Synergistic effect of alkali Na and K promoter on Fe-Co-Cu-Al catalysts for CO<sub>2</sub> hydrogenation to light hydrocarbons

Yuhao Zheng, Chenghua Xu\*, Xia Zhang, Qiong Wu and Jie Liu

College of Resources and Environment, Chengdu University of Information and Technology,  
610225 Chengdu, R.R. China

Correspondence: xch@cuit.edu.cn (C. Xu); Tel.: +86-28-8596-6070.

### XRD

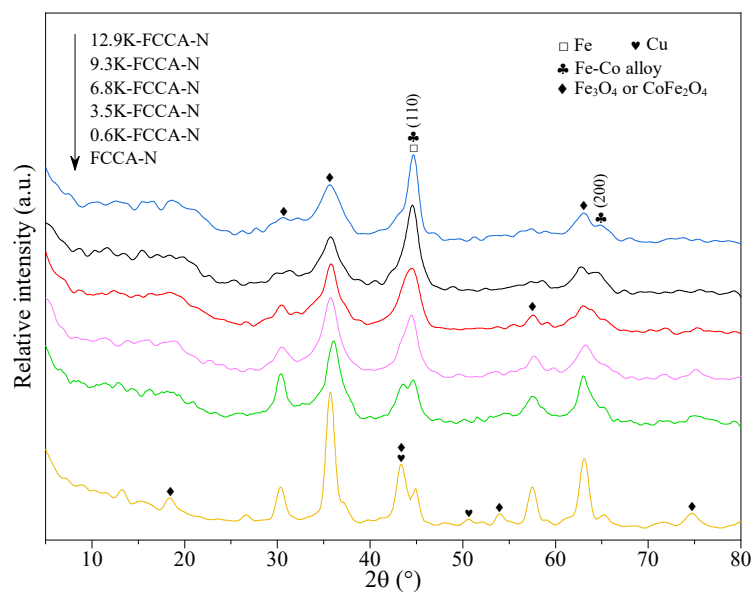

Figure S1. XRD pattern of the reduced FCCA-N modified with different amount of promoter K

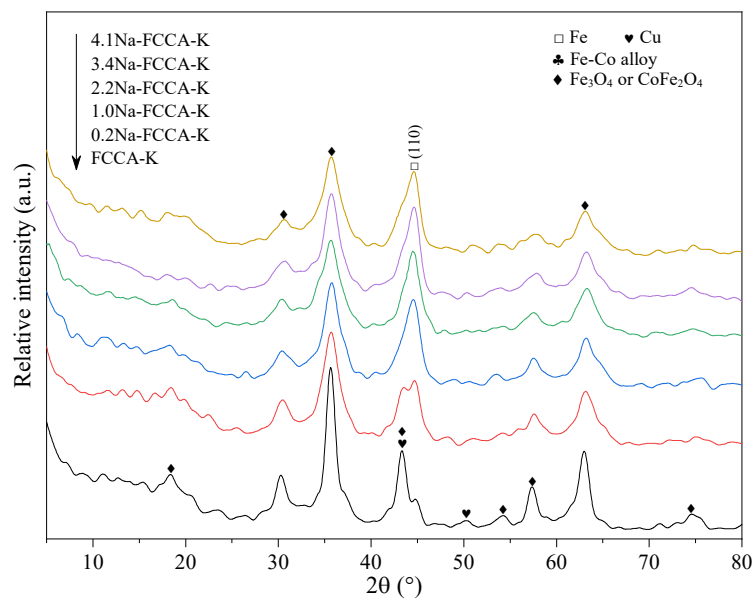

Figure S2. XRD pattern of the reduced FCCA-K modified with different amount of promoter Na

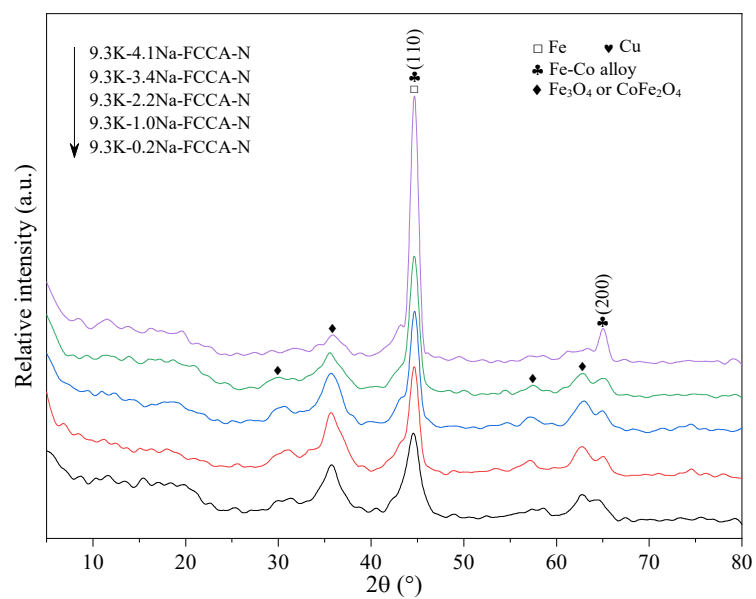

Figure S3. XRD pattern of reduced K-Na-FCCA-N catalysts (K/Fe 9.3mol%) modified by different Na content

## H<sub>2</sub>-TPR

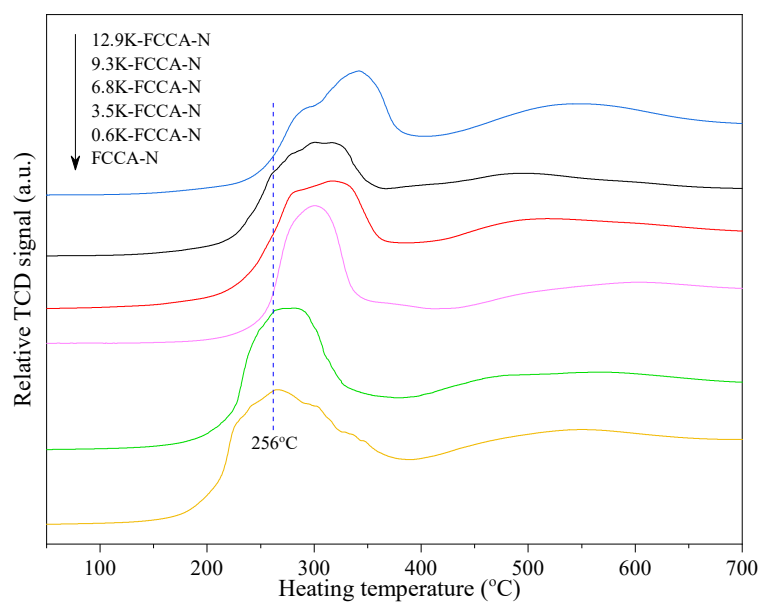

Figure S4. H<sub>2</sub>-TPR profiles of FCCA-N catalysts promoted with different amount of K

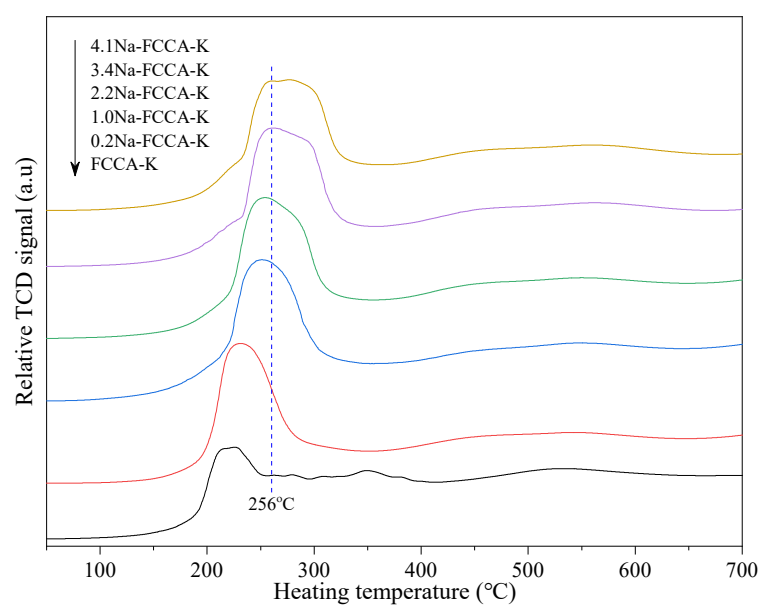

Figure S5. H<sub>2</sub>-TPR profiles of FCCA-K catalysts promoted with different amount of Na

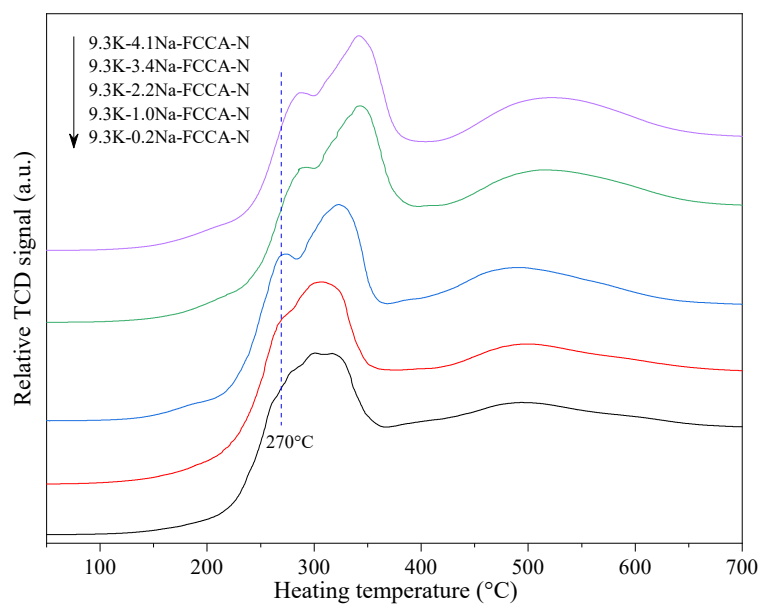

Figure S6.  $\text{H}_2$ -TPR profiles of K-Na-FCCA-N catalysts (K/Fe 9.3mol%) promoted with different amount of Na

## $\text{H}_2$ -TPD

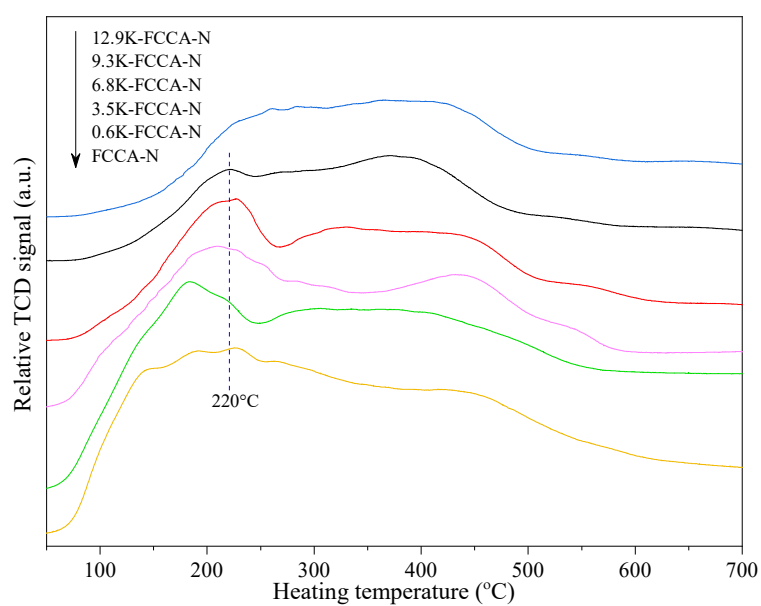

Figure S7.  $\text{H}_2$ -TPD profiles of FCCA-N catalysts promoted with different amount of K

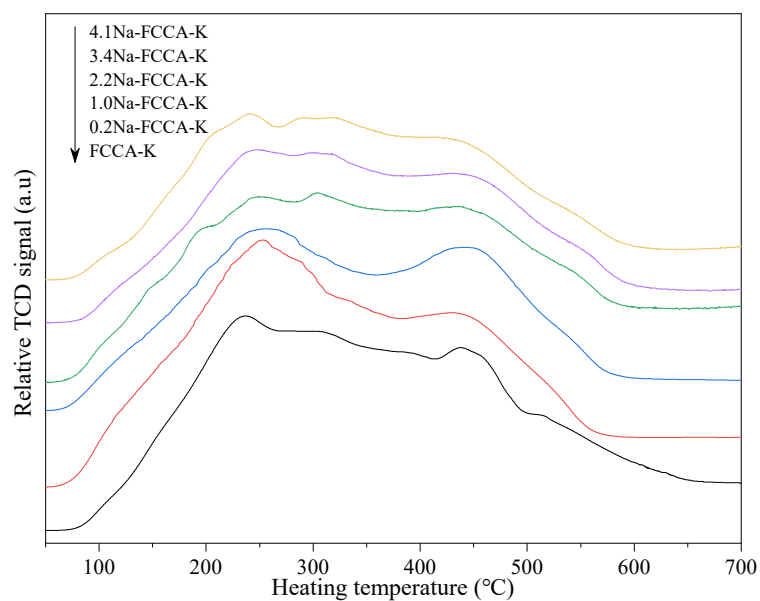

Figure S8. H<sub>2</sub>-TPD profiles of FCCA-K catalysts promoted with different amount of Na

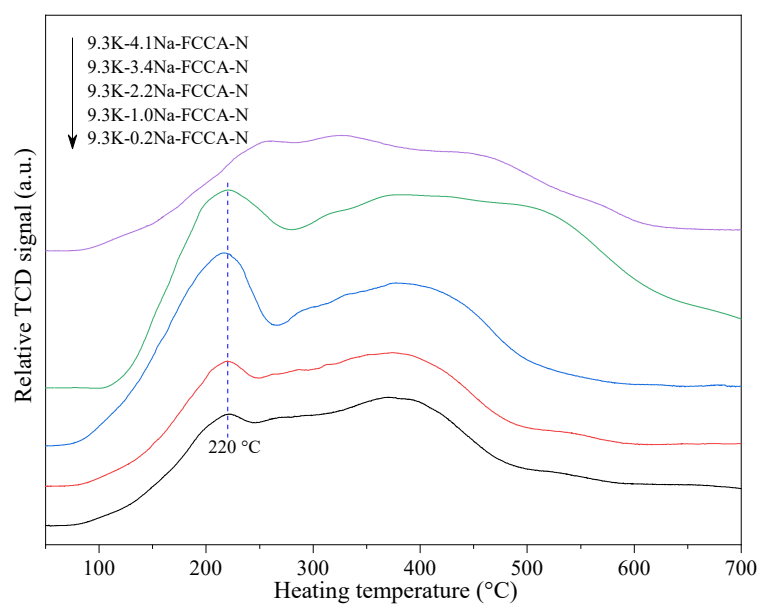

Figure S9. H<sub>2</sub>-TPD profiles of K-Na-FCCA-N catalysts (K/Fe 9.3mol%) promoted with different amount of Na

CO<sub>2</sub>-TPD

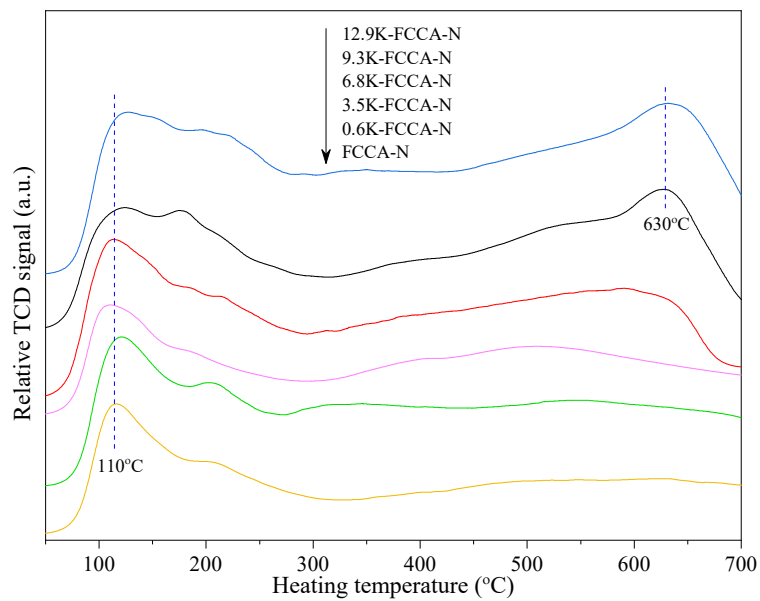

Figure S10. CO<sub>2</sub>-TPD profiles of FCCA-N catalysts promoted with different amount of K

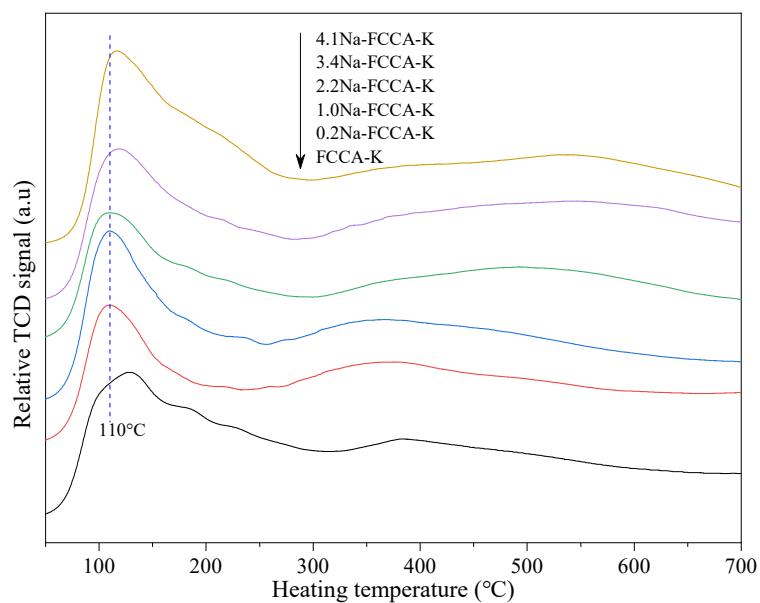

Figure S11. CO<sub>2</sub>-TPD profiles of FCCA-K catalysts promoted with different amount of Na

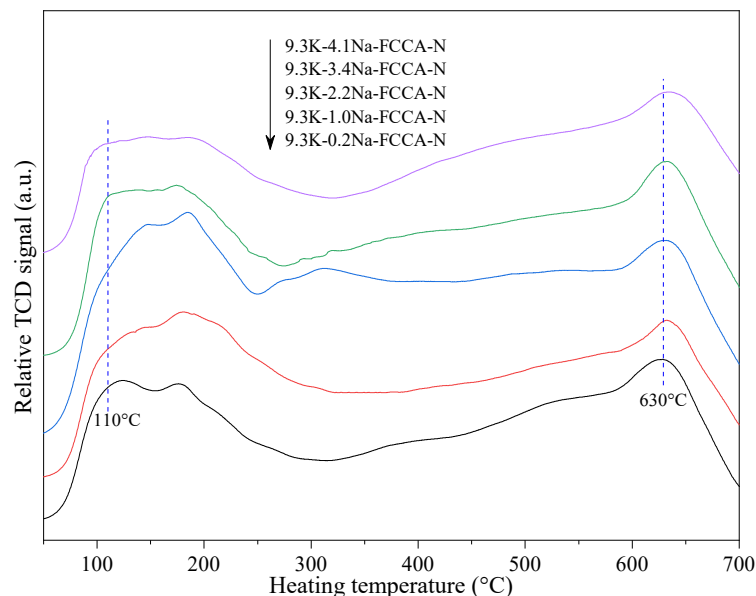

Figure S12. CO<sub>2</sub>-TPD profiles of K-Na-FCCA-N catalysts (K/Fe 9.3mol%) promoted with different amount of Na

Table S1. Textural and catalytic properties of K-promoted FCCA-N in CO<sub>2</sub> hydrogenation

| K/Fe ratio<br>in catalyst<br>(mol%) | N <sub>2</sub> adsorption-desorption                   |                                           |                           | CO <sub>2</sub><br>conv.<br>(mol%) | Distribution of products (mol%) |                 |                             |                                          |                                            |
|-------------------------------------|--------------------------------------------------------|-------------------------------------------|---------------------------|------------------------------------|---------------------------------|-----------------|-----------------------------|------------------------------------------|--------------------------------------------|
|                                     | $S_{\text{BET}}$<br>(m <sup>2</sup> ·g <sup>-1</sup> ) | $V_{\text{BJH}}$<br>(mL·g <sup>-1</sup> ) | $d_{\text{pore}}$<br>(nm) |                                    | CO                              | CH <sub>4</sub> | C <sub>2</sub> <sup>+</sup> | Olefin<br>C <sub>2</sub> -C <sub>4</sub> | Paraffin<br>C <sub>2</sub> -C <sub>4</sub> |
| 0                                   | 134.1                                                  | 0.42                                      | 4.1                       | 35.02                              | 2.56                            | 26.13           | 71.31                       | 20.98                                    | 44.50                                      |
| 0.6                                 | 117.6                                                  | 0.36                                      | 4.0                       | 41.42                              | 2.20                            | 25.04           | 72.76                       | 20.73                                    | 43.37                                      |
| 3.5                                 | 107.6                                                  | 0.35                                      | 4.2                       | 43.48                              | 3.00                            | 24.19           | 72.81                       | 21.43                                    | 38.03                                      |
| 6.8                                 | 113.8                                                  | 0.33                                      | 3.8                       | 44.48                              | 3.63                            | 22.45           | 73.92                       | 24.38                                    | 31.31                                      |
| 9.3                                 | 105.4                                                  | 0.36                                      | 4.2                       | 46.22                              | 2.89                            | 17.00           | 80.11                       | 25.51                                    | 33.67                                      |
| 12.9                                | 102.9                                                  | 0.31                                      | 4.0                       | 46.36                              | 2.30                            | 13.64           | 84.06                       | 23.97                                    | 42.35                                      |

Table S2. Textural and catalytic properties of Na-promoted FCCA-K in CO<sub>2</sub> hydrogenation

| Na/Fe ratio<br>in catalyst<br>(mol%) | N <sub>2</sub> adsorption-desorption                   |                                           |                           | CO <sub>2</sub><br>conv.<br>(mol%) | Distribution of products (mol%) |                 |                             |                                          |                                            |
|--------------------------------------|--------------------------------------------------------|-------------------------------------------|---------------------------|------------------------------------|---------------------------------|-----------------|-----------------------------|------------------------------------------|--------------------------------------------|
|                                      | $S_{\text{BET}}$<br>(m <sup>2</sup> ·g <sup>-1</sup> ) | $V_{\text{BJH}}$<br>(mL·g <sup>-1</sup> ) | $d_{\text{pore}}$<br>(nm) |                                    | CO                              | CH <sub>4</sub> | C <sub>2</sub> <sup>+</sup> | Olefin<br>C <sub>2</sub> -C <sub>4</sub> | Paraffin<br>C <sub>2</sub> -C <sub>4</sub> |
| 0                                    | 102.9                                                  | 0.32                                      | 4.0                       | 36.7                               | 2.68                            | 32.15           | 65.17                       | 16.29                                    | 33.33                                      |
| 0.2                                  | 149.6                                                  | 0.32                                      | 3.0                       | 46.69                              | 3.07                            | 21.31           | 75.62                       | 26.26                                    | 33.66                                      |
| 1.0                                  | 154.8                                                  | 0.31                                      | 2.9                       | 47.66                              | 3.48                            | 14.86           | 81.66                       | 30.92                                    | 34.94                                      |
| 2.2                                  | 144.5                                                  | 0.33                                      | 3.1                       | 46.79                              | 5.62                            | 12.39           | 81.99                       | 31.32                                    | 34.67                                      |
| 3.4                                  | 135.9                                                  | 0.34                                      | 3.2                       | 47.52                              | 4.77                            | 10.22           | 85.01                       | 28.35                                    | 40.00                                      |
| 4.1                                  | 131.0                                                  | 0.31                                      | 3.1                       | 44.77                              | 4.85                            | 11.33           | 83.82                       | 30.10                                    | 36.58                                      |

Table S3. Textural property and catalytic performance of Na-promoted K-FCCA-N catalysts (K/Fe 9.3mol%) in CO<sub>2</sub> hydrogenation

| Na/Fe ratio<br>in catalyst<br>(mol%) | N <sub>2</sub> adsorption-desorption                   |                                           |                           | CO <sub>2</sub><br>conv.<br>(mol%) | Distribution of products (mol%) |                 |                             |                                          |                                            |
|--------------------------------------|--------------------------------------------------------|-------------------------------------------|---------------------------|------------------------------------|---------------------------------|-----------------|-----------------------------|------------------------------------------|--------------------------------------------|
|                                      | $S_{\text{BET}}$<br>(m <sup>2</sup> ·g <sup>-1</sup> ) | $V_{\text{BJH}}$<br>(mL·g <sup>-1</sup> ) | $d_{\text{pore}}$<br>(nm) |                                    | CO                              | CH <sub>4</sub> | C <sub>2</sub> <sup>+</sup> | Olefin<br>C <sub>2</sub> -C <sub>4</sub> | Paraffin<br>C <sub>2</sub> -C <sub>4</sub> |
| 0.2                                  | 119.8                                                  | 0.33                                      | 3.6                       | 46.22                              | 2.89                            | 17.00           | 80.11                       | 25.51                                    | 33.67                                      |
| 1.0                                  | 114.2                                                  | 0.28                                      | 3.3                       | 51.59                              | 2.16                            | 10.33           | 87.51                       | 29.90                                    | 40.27                                      |
| 2.2                                  | 110.5                                                  | 0.27                                      | 3.3                       | 51.05                              | 2.31                            | 7.82            | 89.87                       | 31.54                                    | 40.38                                      |
| 3.4                                  | 110.3                                                  | 0.28                                      | 3.4                       | 52.87                              | 2.29                            | 8.01            | 89.70                       | 32.14                                    | 39.98                                      |
| 4.1                                  | 101.3                                                  | 0.27                                      | 3.4                       | 53.01                              | 2.08                            | 8.31            | 89.61                       | 31.90                                    | 41.44                                      |
